# Supplementary material for: High Prevalence of Hypertension in Ethiopian and Non-Ethiopian HIV-Infected Adults
Source: Hindawi journal article supplement (doi:10.1155/2018/8637101), 2018-01-01
Supplement: f1 [file 8637101.f1.pdf]

**Supplement 1.** Blood pressure data from a survey conducted by the Ministry of Health and the Central Bureau of Statistics in Israel during 2003-2004.

## *Morbidity*

**Chronically ill**  
**By illness, age, gender**  
**And population group**  
**Rate per 100 persons**

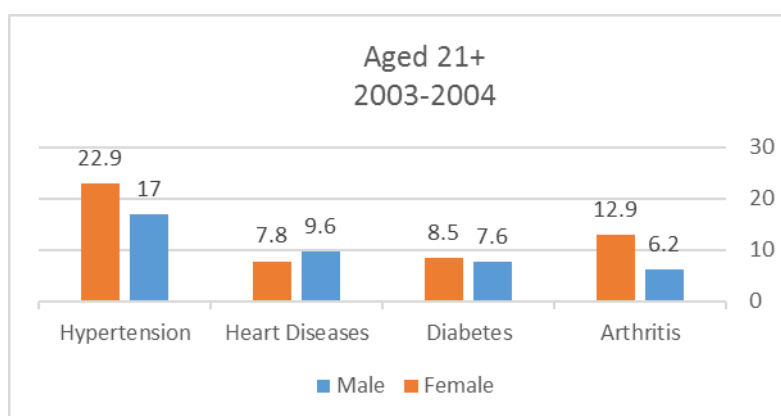

|                         | Hypertension | Heart Diseases | Diabetes   | Arthritis   |
|-------------------------|--------------|----------------|------------|-------------|
| <b>Total</b>            | <b>20</b>    | <b>8.7</b>     | <b>8.1</b> | <b>9.7</b>  |
| 21-44                   | 6.8          | 1.8            | 2.4        | 4.1         |
| 45-64                   | 27.4         | 10.7           | 11.2       | 12.3        |
| 65+                     | 51.1         | 28.2           | 21.7       | 23.7        |
| <b>Gender</b>           |              |                |            |             |
| <b>Males</b>            | <b>17</b>    | <b>9.6</b>     | <b>7.6</b> | <b>6.2</b>  |
| 21-44                   | 5.6          | 2              | 1.7        | 3.3         |
| 45-64                   | 26.1         | 13.4           | 11.8       | 8           |
| 65+                     | 42.5         | 31.6           | 22.1       | 13.7        |
| <b>Females</b>          | <b>22.9</b>  | <b>7.8</b>     | <b>8.5</b> | <b>12.9</b> |
| 21-44                   | 8.1          | 1.6            | 3.1        | 4.9         |
| 45-64                   | 28.6         | 8.3            | 10.6       | 16.2        |
| 65+                     | 57.7         | 25.6           | 21.4       | 31.4        |
| <b>Population group</b> |              |                |            |             |
| <b>Jews and others</b>  | <b>20.7</b>  | <b>9</b>       | <b>8.1</b> | <b>9.2</b>  |
| 21-44                   | 6.8          | 1.9            | 2.5        | 3.6         |
| 45-64                   | 26.6         | 10             | 10.3       | 10.9        |
| 65+                     | 52           | 28.6           | 21.4       | 22.9        |
| <b>Arabs</b>            | <b>15.2</b>  | <b>6.3</b>     | <b>7.7</b> | <b>12.9</b> |
| 21-44                   | 7            | (1.3)          | (2)        | 6.4         |
| 45-64                   | 34.8         | 17.8           | 19.6       | 25.5        |
| 65+                     | 34.9         | (20.2)         | 27.6       | 39          |

Source: Health Survey 2003-2004, Ministry of Health and CBS  
Based on reported ever having been diagnosed with the chronic illness.

( ) Estimate for which the relative sampling error is 25%-40%, or estimates based on 11-20 respondents.
